# Supplementary material for: Probing the structural and magnetic properties of transition metal-benzene anion complexes
Source: Royal Society of Chemistry journal article supplement (doi:10.1039/c1dt10255a), 2011-01-01
Supplement: c1dt10255a.pdf [file c1dt10255a.pdf]

Probing the structural and magnetic properties of transition  
metal-benzene anion complexes

Supplementary Information

Hui-Fang Li,<sup>a</sup> Huai-Qian Wang,<sup>a</sup> Xiao-Yu Kuang<sup>a,b,\*</sup>

<sup>a</sup> Institute of Atomic and Molecular Physics, Sichuan University, Chengdu 610065, China

<sup>b</sup> International Centre for Materials Physics, Academia Sinica, Shenyang 110016, China

**Table S1** Calculated vertical detachment energies (VDEs) for  $\text{TiBz}^-$  by considering the  $C_{2v}$  point symmetry, all units in eV.

| System                    | VDE( $\alpha$ )<br>(triplet) | VDE( $\beta$ )<br>(quintet) | Expt. <sup>a</sup> |
|---------------------------|------------------------------|-----------------------------|--------------------|
| $\text{TiBz}^-$ (quartet) | 0.68                         |                             | 1.05±0.05          |
|                           |                              | 0.90                        |                    |
|                           | 0.93                         |                             |                    |
|                           | 1.00                         |                             |                    |
|                           | 1.28                         |                             |                    |

<sup>a</sup> Experimental VDEs from ref. 3.

**Table S2** Calculated vertical detachment energies (VDEs) for  $\text{TiBz}^-$  by considering the  $C_{6v}$  point symmetry, all units in eV.

| System                    | VDE( $\alpha$ )<br>(singlet) | VDE( $\beta$ )<br>(triplet) | Expt. <sup>a</sup> |
|---------------------------|------------------------------|-----------------------------|--------------------|
| $\text{TiBz}^-$ (doublet) |                              | 0.77                        | 1.05±0.05          |
|                           | 0.83                         |                             |                    |
|                           | 0.91                         |                             |                    |

<sup>a</sup> Experimental VDEs from ref. 3.

**Table S3** Calculated vertical detachment energies (VDEs) for  $\text{TiBz}_2^-$ , all units in eV.

| System                      | VDE( $\alpha$ )<br>(singlet) | VDE( $\beta$ )<br>(triplet) | Expt. <sup>a</sup> |
|-----------------------------|------------------------------|-----------------------------|--------------------|
| $\text{TiBz}_2^-$ (doublet) | 0.37                         |                             | 0.23±0.05          |
|                             |                              | 1.23                        |                    |
|                             |                              | 1.23                        |                    |
|                             | 1.38                         |                             |                    |
|                             | 1.38                         |                             |                    |

<sup>a</sup> Experimental VDEs from ref. 3.

**Table S4** Calculated vertical detachment energies (VDEs) for  $\text{Ti}_2\text{Bz}_2^-$  by considering  $D_{2h}$  point symmetry, all units in eV.

| System                              | VDE( $\alpha$ )<br>(singlet) | VDE( $\beta$ )<br>(triplet) |
|-------------------------------------|------------------------------|-----------------------------|
| $\text{Ti}_2\text{Bz}_2^- (D_{2h})$ |                              | 0.45                        |
|                                     | 0.49                         |                             |
|                                     | 0.58                         |                             |
|                                     |                              | 0.77                        |
|                                     | 0.90                         |                             |
|                                     |                              | 2.19                        |
|                                     | 2.24                         |                             |
|                                     |                              | 2.49                        |
|                                     | 2.57                         |                             |

**Table S5** Calculated vertical detachment energies (VDEs) for  $\text{Ti}_2\text{Bz}_2^-$  by considering  $C_{2h}$  point symmetry, all units in eV.

| System                              | VDE( $\alpha$ )<br>(singlet) | VDE( $\beta$ )<br>(triplet) |
|-------------------------------------|------------------------------|-----------------------------|
| $\text{Ti}_2\text{Bz}_2^- (C_{2h})$ | 0.42                         |                             |
|                                     |                              | 0.91                        |
|                                     | 0.94                         |                             |
|                                     |                              | 1.89                        |
|                                     |                              | 1.90                        |
|                                     | 1.92                         |                             |
|                                     | 1.94                         |                             |
|                                     |                              | 1.96                        |
|                                     |                              | 2.16                        |

**Table S6** Calculated vertical detachment energies (VDEs) for  $\text{Ti}_2\text{Bz}_3^-$  by considering quartet spin state, all units in eV.

| System                               | VDE( $\alpha$ )<br>(triplet) | VDE( $\beta$ )<br>(quintet) | Expt. <sup>a</sup> |
|--------------------------------------|------------------------------|-----------------------------|--------------------|
| $\text{Ti}_2\text{Bz}_3^-$ (quartet) | 0.81                         |                             | 0.90±0.075         |
|                                      | 0.90                         |                             |                    |
|                                      |                              | 1.10                        |                    |
|                                      | 1.18                         |                             |                    |
|                                      | 1.27                         |                             |                    |
|                                      |                              | 1.93                        |                    |
|                                      |                              | 2.12                        |                    |
|                                      | 2.33                         |                             |                    |
| 2.34                                 |                              |                             |                    |

<sup>a</sup> Experimental VDEs from ref. 3.

**Table S7** Calculated vertical detachment energies (VDEs) for  $\text{Ti}_2\text{Bz}_3^-$  by

considering doublet spin state, all units in eV.

| System                                                 | VDE( $\alpha$ )<br>(singlet) | VDE( $\beta$ )<br>(triplet) | Expt. <sup>a</sup> |
|--------------------------------------------------------|------------------------------|-----------------------------|--------------------|
| Ti <sub>2</sub> Bz <sub>3</sub> <sup>-</sup> (doublet) |                              | 0.87                        | 0.90±0.075         |
|                                                        |                              | 0.90                        |                    |
|                                                        |                              | 0.90                        |                    |
|                                                        |                              | 1.02                        |                    |
|                                                        |                              | 1.02                        |                    |
|                                                        |                              | 2.21                        |                    |
|                                                        |                              | 2.21                        |                    |
|                                                        |                              | 2.32                        |                    |
|                                                        |                              | 2.32                        |                    |

<sup>a</sup> Experimental VDEs from ref. 3.

C

**Table S8** Calculated vertical detachment energies (VDEs) for CoBz<sup>-</sup>, all units in eV.

| System                      | VDEs<br>(doublet) | VDEs<br>(quartet) |
|-----------------------------|-------------------|-------------------|
| CoBz <sup>-</sup> (triplet) |                   | 0.26              |
|                             |                   | 1.10              |
|                             |                   | 1.74              |
|                             |                   | 2.00              |
|                             |                   | 2.03              |
|                             |                   | 2.59              |
|                             |                   | 2.61              |

**Table S9** Calculated vertical detachment energies (VDEs) for CoBz<sub>2</sub><sup>-</sup>, all units in eV.

| System                                   | VDEs (doublet) | Expt. <sup>a</sup> |
|------------------------------------------|----------------|--------------------|
| CoBz <sub>2</sub> <sup>-</sup> (singlet) | 0.75           | 0.70               |
|                                          | 1.37           |                    |
|                                          | 1.43           | 1.45               |
|                                          | 2.27           | 2.20               |
|                                          | 2.33           |                    |

<sup>a</sup> Experimental VDEs from ref. 4.

**Table S10** Calculated vertical detachment energies (VDEs) for Co<sub>2</sub>Bz<sub>2</sub><sup>-</sup>, all units in

eV.

| System                                                 | VDE( $\alpha$ )<br>(singlet) | VDE( $\beta$ )<br>(triplet) | Expt. <sup>a</sup> |
|--------------------------------------------------------|------------------------------|-----------------------------|--------------------|
| Co <sub>2</sub> Bz <sub>2</sub> <sup>-</sup> (doublet) |                              | 0.94                        | 1.11               |
|                                                        |                              | 1.03                        |                    |
|                                                        | 1.24                         |                             |                    |
|                                                        | 1.34                         |                             |                    |
|                                                        | 1.40                         |                             |                    |
|                                                        |                              | 1.49                        | 1.50               |
|                                                        |                              | 1.66                        |                    |
|                                                        |                              | 1.79                        | 1.79               |
|                                                        | 1.86                         |                             |                    |
|                                                        |                              | 0.96                        |                    |
|                                                        | 2.01                         |                             |                    |
|                                                        | 2.07                         |                             |                    |
|                                                        |                              | 2.31                        |                    |
|                                                        | 2.36                         |                             |                    |
|                                                        |                              | 2.43                        |                    |
|                                                        | 2.61                         |                             |                    |
|                                                        | 2.72                         |                             |                    |
| 2.76                                                   |                              |                             |                    |
| 3.24                                                   |                              |                             |                    |

<sup>a</sup> Experimental VDEs from ref. 4.

**Table S11** Calculated vertical detachment energies (VDEs) for Co<sub>2</sub>Bz<sub>3</sub><sup>-</sup> by

considering the lowest-energy sandwich structure, all units in eV.

| System                                                 | VDE( $\alpha$ )<br>(singlet) | VDE( $\beta$ )<br>(triplet) | Expt. <sup>a</sup> |
|--------------------------------------------------------|------------------------------|-----------------------------|--------------------|
| Co <sub>2</sub> Bz <sub>3</sub> <sup>-</sup> (doublet) |                              | 0.78                        | 0.95               |
|                                                        | 1.30                         |                             | 1.30               |
|                                                        | 1.34                         |                             |                    |
|                                                        |                              | 1.49                        |                    |
|                                                        |                              | 1.61                        |                    |
|                                                        | 1.74                         |                             | 1.75               |
|                                                        |                              | 1.79                        |                    |
|                                                        | 1.91                         |                             |                    |
|                                                        |                              | 2.01                        |                    |
|                                                        | 2.29                         |                             |                    |
|                                                        | 2.33                         |                             |                    |
|                                                        |                              | 2.48                        | 2.45               |
|                                                        |                              | 2.50                        |                    |
|                                                        |                              | 2.57                        |                    |
|                                                        |                              | 2.63                        |                    |
|                                                        | 2.79                         |                             |                    |
| 2.81                                                   |                              |                             |                    |
| 2.86                                                   |                              |                             |                    |
| 2.90                                                   |                              |                             |                    |

<sup>a</sup> Experimental VDEs from ref. 4.

**Table S12** Calculated vertical detachment energies (VDEs) for Co<sub>2</sub>Bz<sub>3</sub><sup>-</sup> by



considering the lowest-energy rice-ball structure, all units in eV.

| System                                                 | VDE( $\alpha$ )<br>(singlet) | VDE( $\beta$ )<br>(triplet) | Expt. <sup>a</sup> |
|--------------------------------------------------------|------------------------------|-----------------------------|--------------------|
| Co <sub>2</sub> Bz <sub>3</sub> <sup>-</sup> (doublet) | 1.27                         |                             | 1.30               |
|                                                        | 1.273                        |                             |                    |
|                                                        |                              | 1.46                        |                    |
|                                                        | 1.59                         |                             |                    |
|                                                        |                              | 1.81                        | 1.75               |
|                                                        | 1.83                         |                             |                    |
|                                                        |                              | 1.86                        |                    |
|                                                        |                              | 2.02                        |                    |
|                                                        |                              | 2.07                        |                    |
|                                                        | 2.12                         |                             |                    |
|                                                        | 2.17                         |                             |                    |
|                                                        | 2.21                         |                             | 2.45               |
|                                                        |                              | 2.68                        |                    |
|                                                        |                              | 2.77                        |                    |
|                                                        | 2.79                         |                             |                    |
|                                                        | 2.99                         |                             |                    |
|                                                        | 3.05                         |                             |                    |
| 3.06                                                   |                              |                             |                    |
| 3.22                                                   |                              |                             |                    |

<sup>a</sup> Experimental VDEs from ref. 4.
